# Supplementary material for: Prebiotic RNA polymerisation: energetics of nucleotide adsorption and polymerisation on clay mineral surfaces
Source: Royal Society of Chemistry journal article supplement (doi:10.1039/c7cc04276k), 2017-01-01
Supplement: c7cc04276k1.pdf [file c7cc04276k1.pdf]

## Electronic Supplementary Information

### Prebiotic RNA polymerisation: Energetics of nucleotide adsorption and polymerisation on clay mineral surfaces

S. Jelavić<sup>a†</sup>, D. J. Tobler<sup>a</sup>, T. Hassenkam<sup>a</sup>, J. J. DeYoreo<sup>b,c</sup>, S.L.S. Stipp<sup>a</sup> and K.K. Sand<sup>a,b,d</sup>

<sup>a</sup> Nano-Science Center, Department of Chemistry, University of Copenhagen, Universitetsparken 5, Copenhagen 2100, Denmark

<sup>b</sup> Physical Sciences Division, Pacific Northwest National Laboratory, Richland, WA, USA 99352

<sup>c</sup> Department of Materials Science and Engineering, University of Washington, Seattle, WA, USA 98195

<sup>d</sup> Currently at: a) and Geography & Earth Sciences, Aberystwyth University, UK

<sup>†</sup> Corresponding author: [stanislav.jelavic@nano.ku.dk](mailto:stanislav.jelavic@nano.ku.dk)

#### Experimental details:

##### 1. X-ray photoelectron spectroscopy (XPS)

We used XPS to assess the extent of adventitious organic carbon on our mineral substrates and for controlling the quality and the thickness of the self-assembled monolayers (SAM) on the AFM tips. Experiments were performed with a Kratos AXIS Ultra<sup>DL</sup> instrument using a monochromatic AlK $\alpha$  radiation and a charge neutralising system. Analyser pass energy for wide spectra was 160 eV and for high-resolution spectra, it was 20 eV. Data were analysed with the CasaXPS software with the associated relative sensitivity factors that were used for quantitative analysis.

##### 2. Cleaning and characterisation of the substrates used as models for clay mineral surfaces

Experiments were carried out on three substrates: a polished {0001} surface of a natural specular hematite, a polished {0001} surface of synthetic corundum (MTI Corp.) and a freshly cleaved {0001} surface of muscovite mica (Ted Paella, Inc.). Substrates were cleaned before every measurement to remove particulate and organic contamination from mineral surfaces. The hematite crystal was kept in 1 M NaOH solution at 60 °C for 1 hour, sonicated for 20 min to remove particulate contaminants and cleaned for 30 min in an UV/ozone chamber to decrease the amount of adventitious organic carbon compounds (unavoidable organic contamination adsorbed from the air or solution). Corundum was cleaned following

29 the procedure of Argyris et al.<sup>1</sup>; briefly, the crystal was sonicated in acetone for 20 min, dried with N<sub>2</sub> and  
30 treated in an UV/ozone chamber for 30 min. The same steps were then repeated, using ethanol as the  
31 solvent and treatment in the UV/ozone chamber for 40 min. All chemicals were of analytical grade (Sigma-  
32 Aldrich). Mica was cleaved immediately prior to the analysis with a piece of tape; no additional cleaning  
33 steps were made. We determined the amount of adventitious carbon on the cleaned surfaces using XPS.  
34 Surface carbon on the cleaned hematite was 6.9 ± 0.7 at.%, on cleaned corundum was 4.0 ± 0.5 at.% and on  
35 mica after cleaving was 4.5 ± 0.1 at.%. Values represent the average of three analyses (± the range)  
36 collected on three spots on the same specimen.

### 37 **3. Functionalisation of atomic force microscopy (AFM) tips for the dynamic force spectroscopy (DFS)** 38 **measurements and the purity and thickness of the SAMs**

39 We used MSCT (Bruker) in house Au coated tips for DFS measurements. The spring constants of cantilevers  
40 were calculated using a thermal calibration method.<sup>2</sup> The tips were cleaned in the UV/ozone chamber for at  
41 least 10 min and placed in 1 mM ethanol solution of 11-mercaptoundecylphosphoric acid (HS-(CH<sub>2</sub>)<sub>11</sub>H<sub>2</sub>PO<sub>4</sub>,  
42 90%; Sigma-Aldrich) for preparation of the phosphate tips or 1.3 mM diethyl ether of 4-(12-  
43 mercaptododecyl)pyridine (HS-(CH<sub>2</sub>)<sub>12</sub>C<sub>5</sub>H<sub>5</sub>N)<sup>3</sup> for preparation of pyridine tips. Tips were left in the  
44 functionalising solutions for a minimum of 18 hours to form self assembled monolayers (SAM) with  
45 phosphate (phosphate-SAM) and pyridine (pyridine-SAM) pointing towards the solution. To remove the  
46 molecules that did not bind to the Au substrate, tips were rinsed and stored in ethanol for at least 20 min  
47 prior to use. The quality of the functionalisation and the thickness of the SAM was checked with XPS on an  
48 Au substrate (~4x4 cm), functionalised using the same procedure as for the tips. The spectra were charge  
49 referenced by setting the Au<sub>4f7/2</sub> line to 84.0 eV. Figure S1 shows a clean Au substrate (middle), a pyridine-  
50 SAM (top) and a phosphate-SAM (bottom). All three surfaces contained only elements attributable to the  
51 Au substrate and functionalising molecules: C, S, O and P from 11-mercaptoundecylphosphoric acid or C, S  
52 and N from 4-(12-mercaptododecyl)pyridine, suggesting no contamination except adventitious carbon on  
53 the pure Au surface. Figure S2 shows successful formation of the Au-S bonds (bound thiols) between the S-  
54 containing head groups of the functionalising molecules and the Au-substrate. The position of the S<sub>2p</sub> line in  
55 the pyridine-SAM (Figure S1a) suggests that all S bonded to Au,<sup>4</sup> whereas the ratio of bound to unbound  
56 thiol in the case of the phosphate-SAM is 72:28 (Figure S1b). To confirm that the bulk unbound thiol does  
57 not sit on top of the phosphate-SAM, we approximated the thickness of the organic overlayer, *d*, by taking  
58 a standard expression:<sup>5,6</sup>

$$59 \quad d = -\lambda_{Au/SAM} \ln\left(\frac{I_{Au}}{I_{Au}^0}\right), \quad (1)$$

60 where  $\lambda_{Au/SAM}$  represents the attenuation length of  $Au_{4f7/2}$  photoelectrons in the hydrocarbon overlayer

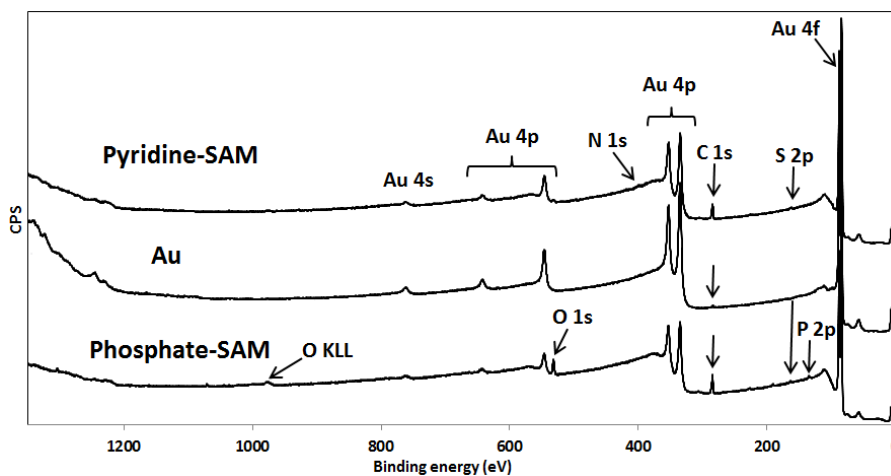

61

62 Figure S1 XPS wide spectra from pure Au (middle), Au functionalised with pyridine (top) and phosphate SAMs (bottom).

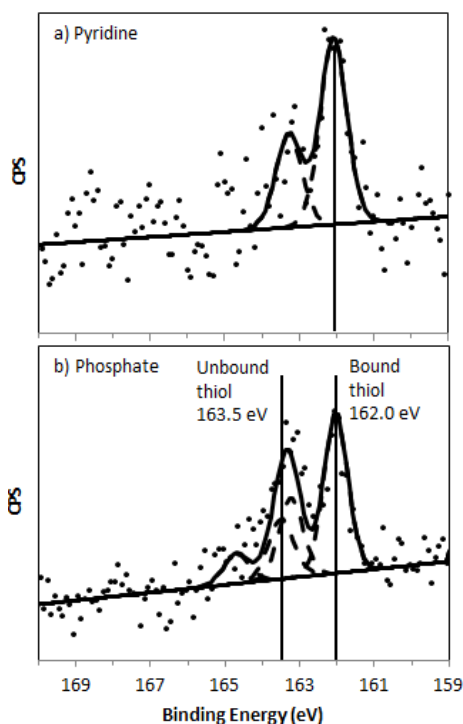

63

64 Figure S2 High resolution XPS spectra of a) 4-(12-mercaptododecyl)pyridine and b) 11-mercaptoundecylphosphoric acid on a Au  
65 substrate. a)  $S_{2p1/2}$  at 162.0 eV suggests the presence of only bound thiol. b) Besides the line at 162.0 eV representing thiol bound  
66 to Au, an additional line at 163.5 eV represents unbound thiol; the ratio of unbound to bound thiol is 72:28.

67

68 (taken as  $42 \text{ \AA}^7$ ),  $I_{Au}$  represents  $Au_{4f7/2}$  line intensity of the SAM-covered Au substrate and  $I_{Au}^0$  represents the  
69  $Au_{4f7/2}$  line intensity of the clean Au substrate (separately measured under the same instrument and  
70 acquisition settings). The thickness,  $19.7 \text{ \AA}$ , is close to the SAM thickness ( $20 \text{ \AA}$ ) measured for an alkane of  
71 similar length with only a carboxylic instead of phosphoric functional group.<sup>8</sup> This thickness suggests

72 formation of a monolayer<sup>9</sup> so we do not expect an excess of 11-mercaptoundecylphosphoric acid to be  
73 sitting on top of the phosphate-SAM and interfering with measurements. The thickness of the pyridine-  
74 SAM was 13.4 Å, also suggesting single monolayer formation.

#### 75 4. DFS measurement

76 The DFS measurements were made to obtain the absolute bond parameters between organic functional  
77 groups representing active adsorption sites on nucleotide and model mineral surfaces representing clay  
78 minerals. The bond parameters were then used for calculating the Gibbs free energy of binding,  $\Delta G_{bu}$ .

79 All experiments were made in 10 mM NaCl solutions at pH=3. Stock solution of 10 mM NaCl (Sigma  
80 Aldrich) was prepared and equilibrated to pH 3 using 0.5 M HCl (Sigma Aldrich). We used an Asylum  
81 Research MFP-3D AFM. Substrates were loaded into the liquid cell and covered with NaCl stock solution. To  
82 minimise the possibility of damaging the tip, we gently approached the surface in tapping mode. The spring  
83 constant was obtained following the experiment. Seven retracting velocities, between 5 and 10,000 nms<sup>-1</sup>,  
84 were chosen to probe the near equilibrium and the kinetic regimes, corresponding to loading rates  
85 between 0.7 and 120 nNs<sup>-1</sup>. All measurements had an approach velocity of 100 nms<sup>-1</sup>, surface dwell time of  
86 0.5 s and trigger point of 100 pN. During the measurements, the tip made a random walk over the surface  
87 with a step distance of 10 nm. We collected at least 100 force curves per retracting velocity, resulting in at  
88 least 700 force curves per measurement.

89 The hematite and corundum substrates were cleaned between measurements to avoid accumulation of  
90 organic contamination and change of nonspecific, interaction forces. The mica substrate was used in a  
91 couple of subsequent measurements and the averaged forces from subsequent measurements were  
92 combined for data analysis. This is the reason for 7 data points for hematite-phosphate and corundum-  
93 phosphate plots but 14 points for mica-pyridine/phosphate plots (Figure 3). Figure S3 shows there are no  
94 significant differences in the trend of rupture forces over the course of the experiments, showing that the  
95 mineral surfaces were not accumulating contamination and the tip was not being damaged over the course  
96 of the experiment.

97

98

99

100

## 101 5. DFS data processing

102 Data were analysed using the method reported by Friddle et al.<sup>10</sup> DFS plots show the average rupture force,  
103  $f$ , as a function of the logarithm of the applied loading rate.  $f$  is calculated as the average of all rupture  
104 forces for a given loading rate. Effective loading rates were determined from the product of the apparent  
105 retraction velocity and the spring constant of the cantilever. This approach is valid because the alkanethiol  
106 SAM's are not elastic so the whole cantilever-SAM system behaves as a stiff probe. When a sufficiently  
107 broad range of loading rates is probed, two regimes can be recognised in a  $f$  vs.  $\log(\text{loading rate})$  plot: a  
108 near equilibrium regime and a kinetic regime.<sup>10,11</sup> The near equilibrium regime covers conditions at which  
109 the loading rate is small enough for a bond to reform during the separation of two molecules while in the  
110 kinetic regime, the loading rates are too strong for the bond to reform once it is broken. In the  $f$  vs.  
111  $\log(\text{loading rate})$  plots, the near equilibrium regime is recognised as plateaued values of average forces at  
112 low loading rates and a kinetic regime is recognised as values of average forces steeply increasing at higher  
113 loading rates (Figure 3a,b). Fitting the DFS data to the dependency between rupture forces and loading  
114 rates in case of formation of multiple bonds between the tip and the substrate, we obtained: i) the  
115 equilibrium rupture force at static conditions,  $f_{eq}$ , ii) the distance between the bound and the transition  
116 state,  $x_b$  and iii) the thermal off-rate i.e. the intrinsic unbinding rate in the absence of applied force,  $k_{off}$ .

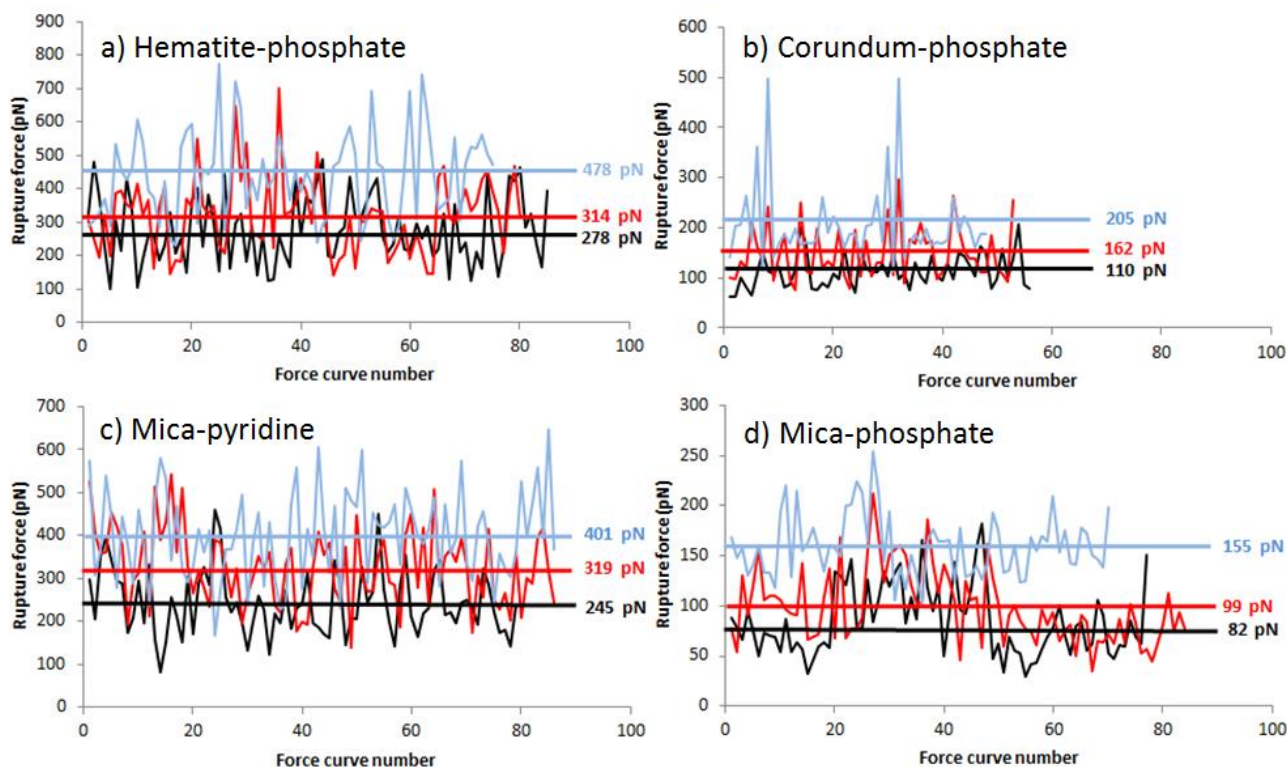

Figure S3 Plots of rupture forces of single force curves collected over the course of the experiment for lowest (black), middle (red) and highest (blue) loading rates for interactions of a) hematite-phosphate, b) corundum-phosphate, c) mica-pyridine and d) mica-phosphate. The numbers on the right are calculated average rupture forces for given loading rates. They show no systematic change in the trend of rupture forces during the experiment.

117  $\Delta G_{bu}$  can then be determined by taking Equation (8) of Friddle et al. (2012)<sup>10</sup>:

118 
$$f_{eq} = \frac{k_B T}{x_t} W\left(e^{\left(\frac{\Delta G_{bu}}{k_B T} - 1\right)}\right), \quad (2)$$

119 where  $k_B$  represents the Boltzmann constant,  $T$ , the absolute temperature and  $W$ , the Lambert function  
120 defined as:

121 
$$x = W(x)e^{W(x)}. \quad (3)$$

122 Rearranging Equation (2):

123 
$$\frac{f_{eq} x_t}{k_B T} = W\left(e^{\left(\frac{\Delta G_{bu}}{k_B T} - 1\right)}\right), \quad (4)$$

124 and considering:

125 
$$x = e^{\left(\frac{\Delta G_{bu}}{k_B T} - 1\right)}, \quad (5)$$

126 then by combining Equations (4) and (5), we obtain:

127 
$$e^{\left(\frac{\Delta G_{bu}}{k_B T} - 1\right)} = \frac{f_{eq} x_t}{k_B T} e^{\frac{f_{eq} x_t}{k_B T}}. \quad (6)$$

128 By further developing Equation (6) we obtain:

129 
$$\Delta G_{bu} = k_B T \ln \frac{f_{eq} x_t}{k_B T} + f_{eq} x_t + k_B T. \quad (7)$$

130 We want to emphasise that the reason there is no term for the effective spring constant of the cantilever in  
131 Equations (2-7) is that, when many bonds form, the  $\Delta G_{bu}$  (and  $f_{eq}$ ) are determined by the ensemble of bonds  
132 that break and reform between the probe and the surface, and not by the spring constant, as is the case for  
133 a single bond where there is only one interaction between the surface and the unbound state at the end of  
134 a cantilever<sup>10</sup>.

135 The length of alkanethiols decorating the tip is much shorter than the curvature of the tip, and we can  
136 therefore expect formation of multiple bonds between the tip and the substrate.<sup>10</sup> The number of bonds,  
137  $N$ , in the DFS experiment influences the values for both  $f_{eq}$  and  $x_t$ . It is not possible to deduce single  
138 molecule interactions from the alkanethiol SAMs because the alkanethiols are not flexible and the elastic  
139 response of the linker cannot be used to discriminate single molecule force curves. However, the exact  
140 knowledge of  $N$  is not necessary for comparison among different datasets as long as  $N$  remains relatively

141 similar throughout the experiments. To estimate the variability between our functionalised probes and to  
 142 ensure that we report significant trends between our experimental systems, we tested multiple tips of the  
 143 same type and functionalisation, similar radii and spring constants to estimate variability. For our analysis,  
 144 we used a verified approach<sup>12,13</sup> where we only considered measurements that yielded values for  $x_t \sim 1 \text{ \AA}$ ,  
 145 which are typical of single molecule bonds<sup>14</sup> while much smaller values result from multiple bonds<sup>10</sup>. This  
 146 approach allows us to compare the results between experiments. We cannot be certain, however, that  
 147 these measurements are actually single molecule interactions and for that reason we are applying a  
 148 multibond model<sup>10</sup> for the data treatment. Table S1 shows the average obtained values with uncertainty  
 149 expressed as half of the range for the four experimental systems.

150

151 Table S1

|                      | Hematite—<br>phosphate (n=6) <sup>a</sup> | Corundum—<br>phosphate (n=4) | Mica—<br>phosphate (n=3) | Mica—<br>pyridine (n=3) |
|----------------------|-------------------------------------------|------------------------------|--------------------------|-------------------------|
| $x_t$ (Å)            | $0.4 \pm 0.1^b$                           | $1.1 \pm 0.1$                | $1.2 \pm 0.1$            | $0.7 \pm 0.1$           |
| $f_{eq}$ (pN)        | $255 \pm 20$                              | $94 \pm 9$                   | $78 \pm 8$               | $235 \pm 15$            |
| $\Delta G_{bu}$ (kT) | $5.4 \pm 1.0$                             | $4.8 \pm 0.2$                | $3.9 \pm 0.1$            | $6.5 \pm 1.0$           |

152 <sup>a</sup>n= number of experiments that yielded values for  $x_t \sim 1 \text{ \AA}$

153 <sup>b</sup>uncertainty expressed as half of the range, i.e. (max—min)/2

154

155 The experiments shown in Figure 3 were chosen because they have a  $f_{eq}$  close to the average  $f_{eq}$ . The  
 156 averaged values (Table S1) are not reported in the manuscript for two reasons:

157 i) we cannot know if the measurements that are being averaged represent the same number of bonds  
 158 between the tip and the substrate and

159 ii) the values of  $x_t$  and  $f_{eq}$  for each measurement are most likely already values averaged over a few bonds,  
 160 i.e. over the course of one DFS experiment. Hence, we have to assume that each force curve represents a  
 161 different number of interacting bonds that is averaged once we make the fit.

162 With this approach, the results we report in Figure 3 are representative and we emphasise that taking  
 163 the average  $\Delta G_{bu}$  from Table S1 instead, would not change our discussion nor conclusions. Thus, our  
 164 measurements with different tips on different substrates are internally consistent and the relative  
 165 relationships between measured systems can be considered to be correct, e.g.  $\Delta G_{bu}(\text{mica-pyridine})/$

166  $\Delta G_{bu}(\text{mica-phosphate}) = 1.6 \pm 0.3 \text{ kT}$ ,  $\Delta G_{bu}(\text{mica-pyridine})/\Delta G_{bu}(\text{hematite-phosphate}) = 1.1 \pm 0.2 \text{ kT}$  and  
 167  $\Delta G_{bu}(\text{hematite-phosphate})/\Delta G_{bu}(\text{corundum-phosphate}) = 1.1 \pm 0.2 \text{ kT}$  etc.

## 168 **6. The off-rates and uncertainty of the fitting parameter**

169 The large uncertainties in the  $k_{off}$  of hematite-phosphate and mica-pyridine are a consequence of too  
 170 few probed loading rates in the kinetic regime. How many loading rate data points there are in the near  
 171 equilibrium and how many in the kinetic regime depends on the range of the probed retracting velocities  
 172 for a given AFM tip, i.e. the spring constant of the cantilever. Using very high retracting velocities results in  
 173 a viscous drag exerted on the cantilever, retarding the pulling force and recording a smaller force than is  
 174 actually applied.<sup>15</sup> Because our results are only internally consistent and depend on the AFM tip used, the  
 175 range of loading rates we were able to probe was limited. We considered it to be more important to get  
 176 more points in the near equilibrium region and in the range of loading rates that define the transition  
 177 between the near equilibrium and the kinetic regime because those regions are more important for the  
 178 estimation of the  $f_{eq}$  and,  $x_t$ . Unlike  $k_{off}$ , these parameters are necessary for the calculation of the  $\Delta G_{bu}$   
 179 (Equation 7).

## 180 **7. Surface charge density difference between phosphate-SAMs and pyridine-SAM and its influence on the** 181 **measured $\Delta G_{bu}$**

182 To ensure that the observed differences in  $\Delta G_{bu}$  measurements between mica-phosphate, corundum-  
 183 phosphate and hematite-phosphate, and mica-pyridine are not simply because of different surface charge  
 184 densities between the phosphate-SAM and the pyridine-SAM, we have estimated the ionisation fraction of  
 185 functional groups of SAMs,  $f_i$ , by taking:

$$186 \quad f_{i1} = \left( \frac{[HPO_4^-]}{[H_2PO_4] + [HPO_4^-]} \right) = \frac{\frac{[HPO_4^-]}{[H_2PO_4]}}{1 + \frac{[HPO_4^-]}{[H_2PO_4]}}, \quad (8)$$

$$187 \quad f_{i2} = \left( \frac{[C_5H_5N^+]}{[C_5H_5N] + [C_5H_5N^+]} \right) = \frac{\frac{[C_5H_5N^+]}{[C_5H_5N]}}{1 + \frac{[C_5H_5N^+]}{[C_5H_5N]}} \quad (9)$$

188 where [ ] represents the activity of a species. By taking into account the dissociation constants,  $K_d$ , for  
 189 phosphate-SAM and pyridine-SAM at low pH, we obtain:

$$190 \quad K_{d1} = \frac{[HPO_4^-][H^+]}{[H_2PO_4]}, \quad (10)$$



191 
$$K_{d2} = \frac{[C_5H_5N][H^+]}{[C_5H_5N^+]}. \quad (11)$$

192 Rearranged, these equations yield:

193 
$$pK_{d1} = pH - \log \frac{[HPO_4^-]}{[H_2PO_4]}, \quad (12)$$

194 
$$pK_{d2} = pH - \log \frac{[C_5H_5N]}{[C_5H_5N^+]}. \quad (13)$$

195 and expressing them as ratios between charged and uncharged species we get:

196 
$$\frac{[HPO_4^-]}{[H_2PO_4]} = 10^{(pH - pK_{d1})} \quad (14)$$

197 
$$\frac{[C_5H_5N^+]}{[C_5H_5N]} = 10^{(pK_{d2} - pH)} \quad (15)$$

198 Inserting Equation (14) in Equation (8) and Equation (15) in Equation (9), we finally obtain:

199 
$$f_{i1} = \frac{10^{(pH - pK_{d1})}}{1 + 10^{(pH - pK_{d1})}}, \quad (16)$$

200 
$$f_{i2} = \frac{10^{(pK_{d2} - pH)}}{1 + 10^{(pK_{d2} - pH)}}. \quad (17)$$

201  $f_i$  estimates the surface charge of a SAM as a function of how far pH is from the equilibrium acid  
 202 dissociation constant,  $pK_a$ . Taking for  $pK_{d1} = pK_{a3}(\text{phosphoric acid}) = 2.1^{16}$  and for  $pK_{d2} = pK_a(\text{pyridine}) = 5.3^{17}$ , we find  
 203 from Equations (16) and (17) that, at pH = 3,  $f_{i1} = 0.9$ , suggesting that 90% of phosphate in the phosphate-  
 204 SAM carries a charge and that  $f_{i2} = 1$ , suggesting 100% of pyridine in the pyridine-SAM carries a charge. The  
 205 surface charge density of our SAMs must be solely a function of  $f_i$ , assuming that the structure of  
 206 alkanethiol monolayers is similar regardless of the chain terminating functional groups<sup>18</sup> and that,  
 207 consequently, the packing densities of SAMs are similar. Thus, by calculating a ratio between ionisation  
 208 fraction for pyridine and phosphate SAMs,  $f_{i2}/f_{i1} = 1.1$ , and assuming a linearity between the surface charge  
 209 density and  $\Delta G_{bu}$ , we conclude that any difference between  $\Delta G_{bu}$  of substrate-phosphates and mica-  
 210 pyridine, where  $\Delta G_{bu(\text{mica-pyridine})}/\Delta G_{bu(\text{substrate-phosphate})} \geq 1.1$  cannot be a consequence of difference in surface  
 211 charge density of the SAMs.  $\Delta G_{bu(\text{mica-pyridine})}/\Delta G_{bu(\text{mica-phosphate})} = 1.6$  and  $\Delta G_{bu(\text{mica-pyridine})}/\Delta G_{bu(\text{corundum-phosphate})} =$   
 212  $1.3$  ratios are higher than 1.1 and the difference cannot be related to the surface charge densities of SAMs.  
 213  $\Delta G_{bu(\text{mica-pyridine})}/\Delta G_{bu(\text{mica-hematite})} = 1.1$  and this difference can result from surface charge density difference.  
 214 However, the hematite-phosphate and mica-pyridine  $\Delta G_{bu}$  have overlapping standard deviations. Hence,  
 215 this discussion does not change our interpretation of the data or the conclusions.

216 REFERENCES:

- 217 1. D. Argyrys, A. Phan, A. Striolo and P.D. Asbhy, *J. Phys. Chem. C* 2003, **117**, 10433–10444.
- 218 2. N.A. Burnham, X. Chen, C.S. Hodges, G.A. Matei, E.J. Thoreson, C.J. Roberts, M.C. Davies and S.J.B.  
219 Tandler, *Nanotechnology* 2003, **14**, 1-6.
- 220
- 221 3. K.M.S. Juhl, N. Bovet, T. Hassenkam, K. Dideriksen, C.S. Pedersen, C.M. Jensen, D.V. Okhrimenko and  
222 S.L.S. Stipp, *Langmuir* 2014, **30**, 8741-8750.
- 223
- 224 4. D.G. Castner, K. Hinds and D.W. Grainger, *Langmuir* 1996, **12**, 5083-5086.
- 225
- 226 5. C.D. Bain and G.M. Whitesides, *J. Phys. Chem.* 1989, **93**, 1670-1673.
- 227
- 228 6. C.D. Bain and G.M. Whitesides, *J. Am. Chem. Soc.* 1989, **111**, 7164-7175.
- 229
- 230 7. P.E. Laibinis, C.D. Bain and G.M. Whitesides, *J. Phys. Chem.* 1991, **95**, 7017-7021.
- 231
- 232 8. S.D. Techane, L.J. Gamble and D.G. Castner, *J. Phys. Chem. C* 2011, **115**, 9432-9441.
- 233
- 234 9. J.C. Love, L.A. Estroff, J.K. Kriebel, R.G. Nuzzo and G.M. Whitesides, *Chem. Rev.* 2005, **115**, 1103-1169.
- 235
- 236 10. R.W. Friddle, A. Noy and J.J. De Yoreo, *Proc. Natl. Acad. Sci. U.S.A* 2012, **109**, 13573-13578.
- 237
- 238 11. A. Noy, *Curr. Opin. Chem. Biol.* 2011, **15**, 710-718.
- 239
- 240 12. Hamm, L.M., Giuffre, A.J., Han, N., Tao, J., Wang, D., De Yoreo, J.J., Dove, P.M. *PNAS* 2014, **111**, 1304-  
241 1309.
- 242
- 243 13. Newcomb, C.J., Qafoku, N.P., Grate, J.W., Bailey, V.L., De Yoreo, J.J. *Nat. Comm.* 2017, **8**, 396.
- 244
- 245 14. B.M. Pettitt and M. Karplus, *J. Chem. Phys.* 1985, **83**, 781–789.
- 246
- 247 15. E. Evans, *Annu. Rev. Biophys. Biomol. Struct.* 2001, **30**, 105–128.
- 248
- 249 16. K.J. Powell P.L. Brown, R.H. Byrne, T. Gajda, G. Hefter, S. Sjøberg and H. Wanner, *Pure Appl. Chem.*  
250 2005, **77**, 739–800.
- 251
- 252 17. M.P. Andersson, M.H.M. Olsson and S.L.S. Stipp, *Langmuir* 2014, **30**, 6437–6445
- 253
- 254 18. R.G. Nuzzo, L. H. Dubois and D. L. Allara, *J. Am. Chem. Soc.* 1990, **112**, 558.
